# Supplementary material for: Distinct Human Stem Cell Populations in Small and Large Intestine
Source: PubMed Central journal article supplement (PMC4353627; doi:10.1371/journal.pone.0118792), 2015-03-09
Supplement: pone.0118792.s006.pdf [file pone.0118792.s006.pdf]

**S1\_Table**

| <b>Cell Type</b> | <b>Frequency of Tumor Formation</b> |
|------------------|-------------------------------------|
| SI cells         | 0/5                                 |
| LI cells         | 0/6                                 |
| Colon CSCs       | 5/5                                 |
