# Supplementary material for: Distinct Human Stem Cell Populations in Small and Large Intestine
Source: PubMed Central journal article supplement (PMC4353627; doi:10.1371/journal.pone.0118792), 2015-03-09
Supplement: pone.0118792.s007.pdf [file pone.0118792.s007.pdf]

**S2 Table**

| <b>Symbol</b>  | <b>Gene name</b>                                    |
|----------------|-----------------------------------------------------|
| <i>ATOH1</i>   | atonal homolog 1                                    |
| <i>CCND1</i>   | cyclin D1                                           |
| <i>CD44</i>    | CD44 molecule (Indian blood group)                  |
| <i>CHGA</i>    | chromogranin A                                      |
| <i>FZD6</i>    | frizzled homolog 6                                  |
| <i>IGFBP3</i>  | insulin-like growth factor binding protein 3        |
| <i>HIF1A</i>   | hypoxia inducible factor 1, alpha subunit           |
| <i>MMP7</i>    | matrix metalloproteinase 7                          |
| <i>MUC2</i>    | Mucin2                                              |
| <i>NOTCH2</i>  | notch 2                                             |
| <i>PROM1</i>   | prominin 1                                          |
| <i>SDCCAG1</i> | serologically defined colon cancer antigen 1        |
| <i>SOX4</i>    | SRY (sex determining region Y)-box 4                |
| <i>SPP1</i>    | secreted phosphoprotein 1                           |
| <i>TACSTD2</i> | tumor-associated calcium signal transducer 2        |
| <i>TLE1</i>    | transducin-like enhancer of split 1 (E(sp1) homolog |
