# Supplementary material for: Distinct Human Stem Cell Populations in Small and Large Intestine
Source: PubMed Central journal article supplement (PMC4353627; doi:10.1371/journal.pone.0118792), 2015-03-09
Supplement: pone.0118792.s008.pdf [file pone.0118792.s008.pdf]

**S3 Table**

| <b>Antibody</b> | <b>Antibody-conjugated fluorophore</b> | <b>Company</b>  | <b>Clone</b> | <b>Concentration</b> |
|-----------------|----------------------------------------|-----------------|--------------|----------------------|
| CD24            | FITC                                   | BD Biosciences  | ML5          | 1:50                 |
| CD66c           | PE                                     | BD Biosciences  | B6.2/CD66c   | 1:50                 |
| CD13            | PE                                     | BD Biosciences  | WM15         | 1:25                 |
| CD133.1         | PE                                     | Milteyni Biotec | AC133        | 1:50                 |
| CD166           | PE                                     | BD Biosciences  | 3A6          | 1:10                 |
| EPCAM           | PerCP-Cy5.5                            | iCyt            | 9C4          | 1:50                 |
| HLA-Biotin      | n/a                                    | Ancell          | 3F10         | 1:100                |
| Sav             | APC-Cy7                                | BD Biosciences  | Streptavidin | 1:25                 |
