# Supplementary material for: Distinct Human Stem Cell Populations in Small and Large Intestine
Source: PubMed Central journal article supplement (PMC4353627; doi:10.1371/journal.pone.0118792), 2015-03-09
Supplement: pone.0118792.s009.pdf [file pone.0118792.s009.pdf]

**S4 Table**

| <b>Matrigel media components:</b> | <b>Final Concentration</b> | <b>Company</b>    | <b>SC media</b> | <b>Diff Media</b> |
|-----------------------------------|----------------------------|-------------------|-----------------|-------------------|
| Advanced DMEM/F12                 | 1x                         | Life Technologies | X               | X                 |
| Pen/Strep                         | 100/100 U/mL               | Mediatech         | X               | X                 |
| HEPES                             | 10mM                       | Mediatech         | X               | X                 |
| N2                                | 1x                         | Life Technologies | X               | X                 |
| B27                               | 1x                         | Life Technologies | X               | X                 |
| Glutamax                          | 2mM                        | Life Technologies | X               | X                 |
| Nacetyl-L-Cysteine                | 1mM                        | Sigma             | X               | X                 |
| [Leu15]-Gastrin I human           | 100uM                      | Sigma             | X               | X                 |
| Y-27632                           | 10uM                       | Reagents Direct   | X               | X                 |
| Murine EGF                        | 50ng/mL                    | Peprtech          | X               | X                 |
| Human R-Spondin2                  | 100ng/mL                   | R&D               | X               | X                 |
| Noggin                            | 100ng/mL                   | Peprtech          | X               | X                 |
| A 83-01                           | 500nM                      | Tocris            | X               | X                 |
| Human Wnt-3a                      | 100ng/mL                   | R&D               | X               |                   |
| Nicotinamide                      | 10mM                       | Sigma             | X               |                   |
| SB 202190                         | 10uM                       | Sigma             | X               |                   |
