# Supplementary material for: Distinct Human Stem Cell Populations in Small and Large Intestine
Source: PubMed Central journal article supplement (PMC4353627; doi:10.1371/journal.pone.0118792), 2015-03-09
Supplement: pone.0118792.s010.pdf [file pone.0118792.s010.pdf]

**S5 Table**

| <b>Antibody</b>                     | <b>Manufactureer</b> | <b>Clone</b> | <b>Concentration</b> |
|-------------------------------------|----------------------|--------------|----------------------|
| CHGA                                | Millipore            | LK2H10       | 1:400                |
| EPCAM                               | Abcam                | E144         | 1:50                 |
| MUC2                                | Santa Cruz           | Ccp58        | 1:150                |
| VIL1                                | AbD SeroTec          | ID2C3        | 1:100                |
| Alexa Fluor 488 secondary (anti-Rb) | Life Technologies    | n/a          | 1:300                |
| Alexa Fluor 594 secondary (anti-Ms) | Life Technologies    | n/a          | 1:300                |
