# Supplementary material for: Distinct Human Stem Cell Populations in Small and Large Intestine
Source: PubMed Central journal article supplement (PMC4353627; doi:10.1371/journal.pone.0118792), 2015-03-09
Supplement: pone.0118792.s011.pdf [file pone.0118792.s011.pdf]

**S6 Table**

| <b>Target</b>       | <b>Sequence</b>            |
|---------------------|----------------------------|
| <i>CHGA</i> -Fwd    | CGCTGTCCTGGCTCTTCTG        |
| <i>CHGA</i> -Rev    | CCTTTATTCATAGGGCTGTTCACA   |
| <i>EPHB2</i> -Fwd   | CCCAGTACACCTTCGAGATCCA     |
| <i>EPHB2</i> -Rev   | GGCGAACTGAGGCGAGAA         |
| <i>LGR5</i> -Fwd    | CCTGCGTCTGGATGCTAACC       |
| <i>LGR5</i> -Rev    | GGAATGCAGGCCACTGAAA        |
| <i>MYC</i> -Fwd     | CGTCTCCACACATCAGCACAA      |
| <i>MYC</i> -Rev     | TCTTGGCAGCAGGATAGTCCTT     |
| <i>MUC2</i> -Fwd    | TGGCTGGATTCTGGAAAACC       |
| <i>MUC2</i> -Rev    | TGGCTCTGCAAGAGATGTTAGC     |
| <i>ATOH1</i> -Fwd   | GCAATGTTATCCCGTCGTTCA      |
| <i>ATOH1</i> -Rev   | CCATCTGCAGGGTCTCATATTTG    |
| <i>GAPDH</i> -Fwd   | GGCATCCTGGGCTACACTGA       |
| <i>GAPDH</i> -Rev   | GGAGTGGGTGTCGCTGTTG        |
| <i>CPS1</i> -Fwd    | TCATGATGTTTGTGTATTGCTTCTTT |
| <i>CPS1</i> -Rev    | AACAATATTCCTGGATTAGCCAAAT  |
| <i>MMP7</i> -Fwd    | CCAAATCAACCATAGGTCCAAGA    |
| <i>MMP7</i> -Rev    | CAGCACGGTGAGTCGCATA        |
| <i>RARRES1</i> -Fwd | AGCGCATGCACACTGAACTC       |
| <i>RARRES1</i> -Rev | GGGCTGAAACCCTGAGGAA        |
| <i>SPP1</i> -Fwd    | GCCAGTTGCAGCCTTCTCA        |
| <i>SPP1</i> -Rev    | AAAGCAAATCACTGCAATTCTCA    |
